# Supplementary material
Source: PubMed Central journal article supplement (PMC3205238)
Supplement: NIHMS317784-supplement-supplement_1.pdf [file NIHMS317784-supplement-supplement_1.pdf]

## Online Supplementary Material

**Supplementary Table 1:** Genetic association between SNPs in the UBAC2 genetic locus and Behçet's disease using a pooled DNA GWAS in Turkish patients and controls.

| SNP        | Position | Chromosome | Cytoband | Allele Frequency |          | P value    | Symbol           |
|------------|----------|------------|----------|------------------|----------|------------|------------------|
|            |          |            |          | Case             | Control  |            |                  |
| rs7983415  | 98578414 | 13         | q32.3    | 0.388917         | 0.388628 | 0.575449   |                  |
| rs1410285  | 98581506 | 13         | q32.3    | 0.723702         | 0.671412 | 0.174189   |                  |
| rs2195     | 98581669 | 13         | q32.3    | 0.765711         | 0.655672 | 0.201238   |                  |
| rs7320894  | 98594621 | 13         | q32.3    | 0.44797          | 0.402192 | 0.279499   |                  |
| rs7991143  | 98595930 | 13         | q32.3    | 0.888815         | 0.901708 | 0.703048   |                  |
| rs7989020  | 98600789 | 13         | q32.3    | 0.3486           | 0.354816 | 0.842094   |                  |
| rs9300532  | 98601554 | 13         | q32.3    | 0.677815         | 0.639185 | 0.107059   |                  |
| rs2094502  | 98601837 | 13         | q32.3    | 0.314719         | 0.282789 | 0.907507   |                  |
| rs7317996  | 98603320 | 13         | q32.3    | 0.615431         | 0.681593 | 0.157811   |                  |
| rs9557174  | 98625251 | 13         | q32.3    | 0.791812         | 0.736572 | 0.948077   |                  |
| rs9554563  | 98625393 | 13         | q32.3    | NA               | NA       | 0.408985   |                  |
| rs9517637  | 98639816 | 13         | q32.3    | 0.4389           | 0.511375 | 0.129487   |                  |
| rs9517644  | 98644900 | 13         | q32.3    | 0.459866         | 0.370964 | 0.0026998  |                  |
| rs11069357 | 98647631 | 13         | q32.3    | 0.481508         | 0.362615 | 0.00592414 |                  |
| rs7139964  | 98668215 | 13         | q32.3    | 0.426151         | 0.462535 | 0.0888474  | UBAC2            |
| rs731955   | 98668641 | 13         | q32.3    | 0.495708         | 0.413224 | 0.38405    | UBAC2            |
| rs984477   | 98670434 | 13         | q32.3    | 0.586116         | 0.436105 | 0.0101289  | UBAC2            |
| rs9513584  | 98674282 | 13         | q32.3    | 0.566211         | 0.305658 | 4.05E-06   | UBAC2            |
| rs7332672  | 98675472 | 13         | q32.3    | 0.464941         | 0.514373 | 0.295085   | UBAC2            |
| rs1927732  | 98676740 | 13         | q32.3    | 0.976639         | 0.97232  | 0.69581    | UBAC2            |
| rs9554573  | 98684763 | 13         | q32.3    | 0.525829         | 0.691523 | 0.00677643 | UBAC2            |
| rs7139654  | 98690889 | 13         | q32.3    | 0.254134         | 0.309973 | 0.218548   | UBAC2<br>UNQ1829 |
| rs6491493  | 98698421 | 13         | q32.3    | 0.478291         | 0.341702 | 0.0242623  | UBAC2            |
| rs12857217 | 98714437 | 13         | q32.3    | 0.789756         | 0.732227 | 0.218526   | UBAC2            |
| rs9517668  | 98721841 | 13         | q32.3    | NA               | NA       | 0.0463191  | UBAC2            |
| rs7999348  | 98730923 | 13         | q32.3    | NA               | NA       | 0.00060989 | UBAC2            |
| rs1160294  | 98731595 | 13         | q32.3    | 0.423708         | 0.36878  | 0.546699   | UBAC2            |
| rs10851103 | 98733182 | 13         | q32.3    | NA               | NA       | 0.295078   | UBAC2            |
| rs2182954  | 98735083 | 13         | q32.3    | NA               | NA       | 0.840973   | UBAC2            |
| rs2230343  | 98746098 | 13         | q32.3    | 0.132181         | 0.094955 | 0.895557   | UBAC2 EBI2       |

|            |          |    |       |          |          |            |              |
|------------|----------|----|-------|----------|----------|------------|--------------|
| rs2149263  | 98749951 | 13 | q32.3 | NA       | NA       | 0.973296   | EBI2 UBAC2   |
| rs9557193  | 98750022 | 13 | q32.3 | 0.303618 | 0.344603 | 0.49972    | EBI2 UBAC2   |
| rs17472050 | 98753399 | 13 | q32.3 | 0.664962 | 0.780429 | 0.427911   | UBAC2 EBI2   |
| rs1927728  | 98753534 | 13 | q32.3 | NA       | NA       | 0.126471   | UBAC2 EBI2   |
| rs9554581  | 98760893 | 13 | q32.3 | 0.37457  | 0.283675 | 0.0334353  | UBAC2        |
| rs7139916  | 98773899 | 13 | q32.3 | NA       | NA       | 0.0528368  | UBAC2        |
| rs3742127  | 98777453 | 13 | q32.3 | 0.839912 | 0.811561 | 0.471943   | UBAC2        |
| rs17575643 | 98782676 | 13 | q32.3 | 0.76022  | 0.862521 | 0.00074619 | UBAC2        |
| rs7323390  | 98795969 | 13 | q32.3 | 0.746618 | 0.771698 | 0.269693   | UBAC2        |
| rs727263   | 98802109 | 13 | q32.3 | 0.869498 | 0.958945 | 0.00900337 | FKSG29 UBAC2 |
| rs731150   | 98805551 | 13 | q32.3 | 0.279734 | 0.303787 | 0.255731   | UBAC2        |
| rs7332161  | 98821470 | 13 | q32.3 | 0.749684 | 0.835976 | 0.0462117  | UBAC2        |
| rs10508037 | 98824757 | 13 | q32.3 | 0.254781 | 0.265761 | 0.30363    | UBAC2        |
| rs9517700  | 98825813 | 13 | q32.3 | 0.80817  | 0.748051 | 0.104989   | UBAC2        |
| rs8181880  | 98825958 | 13 | q32.3 | 0.230552 | 0.273331 | 0.084747   | UBAC2        |
| rs9517701  | 98827541 | 13 | q32.3 | 0.273846 | 0.202291 | 0.188197   | UBAC2        |
| rs7325747  | 98827933 | 13 | q32.3 | 0.847532 | 0.914254 | 0.106849   | UBAC2        |
| rs912131   | 98830347 | 13 | q32.3 | 0.593563 | 0.649129 | 0.127296   | UBAC2        |
| rs912130   | 98830403 | 13 | q32.3 | NA       | NA       | 0.00074075 | UBAC2        |
| rs9517704  | 98831062 | 13 | q32.3 | NA       | NA       | 0.0516989  | UBAC2        |
| rs912129   | 98831653 | 13 | q32.3 | 0.285816 | 0.237478 | 0.249962   | UBAC2        |
| rs4772190  | 98832117 | 13 | q32.3 | 0.79688  | 0.810241 | 0.443347   | UBAC2        |
| rs9557205  | 98833273 | 13 | q32.3 | 0.755556 | 0.741014 | 0.985555   | UBAC2        |
| rs9557206  | 98834214 | 13 | q32.3 | 0.398213 | 0.403208 | 0.91874    | UBAC2        |
| rs9557207  | 98834419 | 13 | q32.3 | 0.791734 | 0.718204 | 0.128592   | UBAC2        |
| rs9557210  | 98845505 | 13 | q32.3 | 0.71843  | 0.740594 | 0.376059   | UBAC2        |
| rs16956535 | 98846062 | 13 | q32.3 | 0.924535 | 0.911015 | 0.757067   | UBAC2        |
| rs2390277  | 98856520 | 13 | q32.3 | 0.321421 | 0.401717 | 0.266275   | UBAC2        |
| rs2892976  | 98856562 | 13 | q32.3 | 0.565645 | 0.725574 | 0.0188883  | UBAC2        |

---

NA, not available

**Supplementary Table 2: Conditional haplotype analysis reveals a suggestive evidence for an independent effect of rs7999348 within *UBAC2* in Behçet's disease. Each SNP was tested for an independent genetic effect against the haplotype background formed by the remaining SNPs using PLINK.**

| Conditioning SNP | LRT   | df | P value |
|------------------|-------|----|---------|
| rs9517644        | NA    | 0  | 1       |
| rs11069357       | 0.455 | 1  | 0.5     |
| rs984477         | 0.642 | 1  | 0.42    |
| rs9513584        | NA    | 0  | 1       |
| rs9554573        | NA    | 0  | 1       |
| rs6491493        | NA    | 0  | 1       |
| rs9517668        | NA    | 0  | 1       |
| rs7999348        | 3.25  | 1  | 0.071   |
| rs9554581        | NA    | 0  | 1       |
| rs17575643       | 1.42  | 1  | 0.23    |
| rs727263         | NA    | 0  | 1       |
| rs7332161        | NA    | 0  | 1       |
| rs912130         | NA    | 0  | 1       |
| rs2892976        | 1.42  | 2  | 0.49    |

LRT, likelihood ratio test; df, degrees of freedom; NA, not applicable (no valid model for comparison)

# Supplementary Figure 1

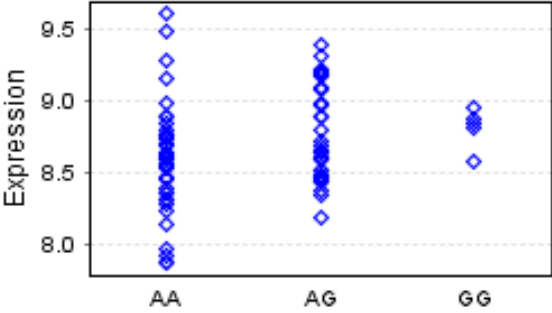

**Supplementary Figure 1:** *UBAC2* expression in lymphoblastoid cell lines included in Genvar database is influenced by rs2181502 ( $r^2=0.88$  with rs799934) ( $P=0.03$ ), consistent with our findings in the Behçet's disease-associated risk allele in rs7999348.
